# Supplementary material
Source: PubMed Central journal article supplement (PMC3687027)
Supplement: NIHMS448617-supplement-Supplement.pdf [file NIHMS448617-supplement-Supplement.pdf]

**SUPPLEMENTARY MATERIAL**

|                        | C57BL/6     | RM1                            | B16-F10                        | NOD/SCID    | LNCaP-C4-2                     |
|------------------------|-------------|--------------------------------|--------------------------------|-------------|--------------------------------|
| BV/TV                  | 0.081±0.003 | 0.148±0.013<br><i>p</i> <0.005 | 0.124±0.002<br><i>p</i> <0.005 | 0.064±0.007 | 0.094±0.010<br><i>p</i> =0.028 |
| Tb.Th (um)             | 45.85±0.139 | 50.34±0.396<br><i>p</i> <0.005 | 50.23±0.390<br><i>p</i> <0.005 | 47.88±0.917 | 51.09±0.824<br><i>p</i> =0.027 |
| Tb.Sp (um)             | 191.35±9.00 | 141.26±5.27<br><i>p</i> <0.005 | 160.69±4.93<br><i>p</i> =0.038 | 168.58±3.13 | 147.12±6.47<br><i>p</i> =0.020 |
| Tb.N (1/mm)            | 1.77±0.066  | 3.19±0.115<br><i>p</i> <0.005  | 2.47±0.056<br><i>p</i> =0.005  | 1.46±0.020  | 1.97±0.196<br><i>p</i> =0.031  |
| BSA (mm <sup>2</sup> ) | 10.06±0.631 | 14.34±1.33<br><i>p</i> <0.005  | 14.99±0.126<br><i>p</i> =0.006 | 3.77±0.406  | 5.67±0.700<br><i>p</i> =0.028  |

**Supplementary Table 1. Bone Structural Indices at the Final Scan Time Point.** Tumor cells were implanted subcutaneously into male mice: B16-F10 murine melanoma ( $2 \times 10^6$  cells in C57BL/6 mice, 9 wks of age), RM1 murine prostate cancer ( $4 \times 10^5$  cells in C57BL/6 mice, 9 wks of age), and LNCaP-C4-2 human prostate cancer ( $4 \times 10^5$  cells encapsulated in matrigel in NOD/SCID mice, 8 wks of age). Corresponding control mice were injected with PBS (for C57BL/6 mice) or matrigel (NOD/SCID mice). Tibial bones were scanned using microCT upon experimental termination *ex vivo*: 9 days (B16-F10), 12 days (RM1), or 19 days (LNCaP-C4-2) after tumor implantation. Bone morphometric changes were measured using a GE eXplore Locus MicroCT scanner with 360 X-ray projections collected at 1° increments and projected images reconstructed into 3D volumes at 20µm resolution as previously described for bone volume: total volume ratio (BV/TV), bone surface area (BSA), average trabecular thickness (Tb.Th), average trabecular spacing (Tb.Sp) and average trabecular number (Tb.N). Values are represented as mean ± SEM (*n*=5). Statistics shown are vs. C57BL/6 or NOD/SCID control mice by paired Student's *t* test.

|                        | Control     | Tumor Alone                    | Tumor +<br>Platelet<br>Depletion | Tumor +<br>Platelet<br>Infusion |
|------------------------|-------------|--------------------------------|----------------------------------|---------------------------------|
| BV/TV                  | 0.077±0.004 | 0.116±0.008<br><i>p</i> =0.005 | 0.082±0.005<br><i>p</i> =0.56    | 0.121±0.012<br><i>p</i> =0.01   |
| Tb.Th (um)             | 45.63±0.118 | 50.22±0.390<br><i>p</i> <0.005 | 47.04±0.489<br><i>p</i> =0.02    | 50.01±1.45<br><i>p</i> =0.006   |
| Tb.Sp (um)             | 191.35±8.99 | 159.29±1.42<br><i>p</i> =0.02  | 183.04±2.24<br><i>p</i> =0.35    | 165.05±2.57<br><i>p</i> =0.02   |
| Tb.N (1/mm)            | 1.69±0.089  | 2.41±0.067<br><i>p</i> <0.005  | 1.73±0.117<br><i>p</i> =0.79     | 2.45±0.181<br><i>p</i> =0.009   |
| BSA (mm <sup>2</sup> ) | 8.87±1.29   | 14.25±0.744<br><i>p</i> =0.02  | 10.27±0.759<br><i>p</i> =0.413   | 14.38±0.767<br><i>p</i> =0.01   |

**Supplementary Table 2. Bone Structural Indices at the Final Scan Time Point.** B16-F10 ( $2 \times 10^6$ ) tumor cells were implanted subcutaneously in 9 wk old C57BL/6 mice. Control mice were injected with PBS. After tumor implantation, mice were treated with rat anti-mouse GPIIb/3a (PLT Depletion) or rat IgG (Tumor Alone and Control) ( $2 \mu\text{g/g}$  body weight, each, Emfret Analytics, Eibelstadt, Germany) by tail vein injection. Injections were repeated every 3 days. Platelets ( $\sim 3 \times 10^9$ ) from two donor mice in resuspension buffer were injected into a single recipient WT mouse just prior to B16-F10 implantation via the tail vein. Platelet infusion was repeated every 5 days until experimental termination. Tibial bones were scanned using microCT 9 days after tumor implantation *ex vivo*. Bone morphometric changes were measured using a GE eXplore Locus MicroCT scanner with 360 X-ray projections collected at  $1^\circ$  increments and projected images reconstructed into 3D volumes at  $20 \mu\text{m}$  resolution for bone volume: total volume ratio (BV/TV), bone surface area (BSA), average trabecular thickness (Tb.Th), average trabecular spacing (Tb.Sp) and average trabecular number (Tb.N). Values are represented as mean  $\pm$  SEM ( $n=4$ ). Statistics shown are vs. control samples by paired Student's *t* test.

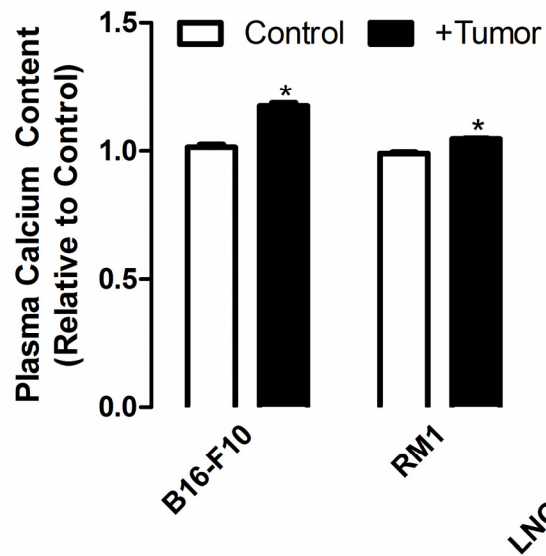

**Supplemental Figure 1. Calcium levels in the plasma of mice bearing tumors.** Plasma was isolated from control injected mice or mice bearing RM1, B16-F10 or LNCaP-C4-2 tumors upon experimental termination and subjected to a StanBio Total Calcium LiquiColor Procedure No. 0150 Assay (Boerne, TX) to measure the concentration of calcium represented as mean  $\pm$  SEM ( $n=2-3$ ). \*  $p<0.05$ , \*  $p<0.01$ , and \*\*\*  $p<0.005$  vs. control by unpaired Student's  $t$  test.

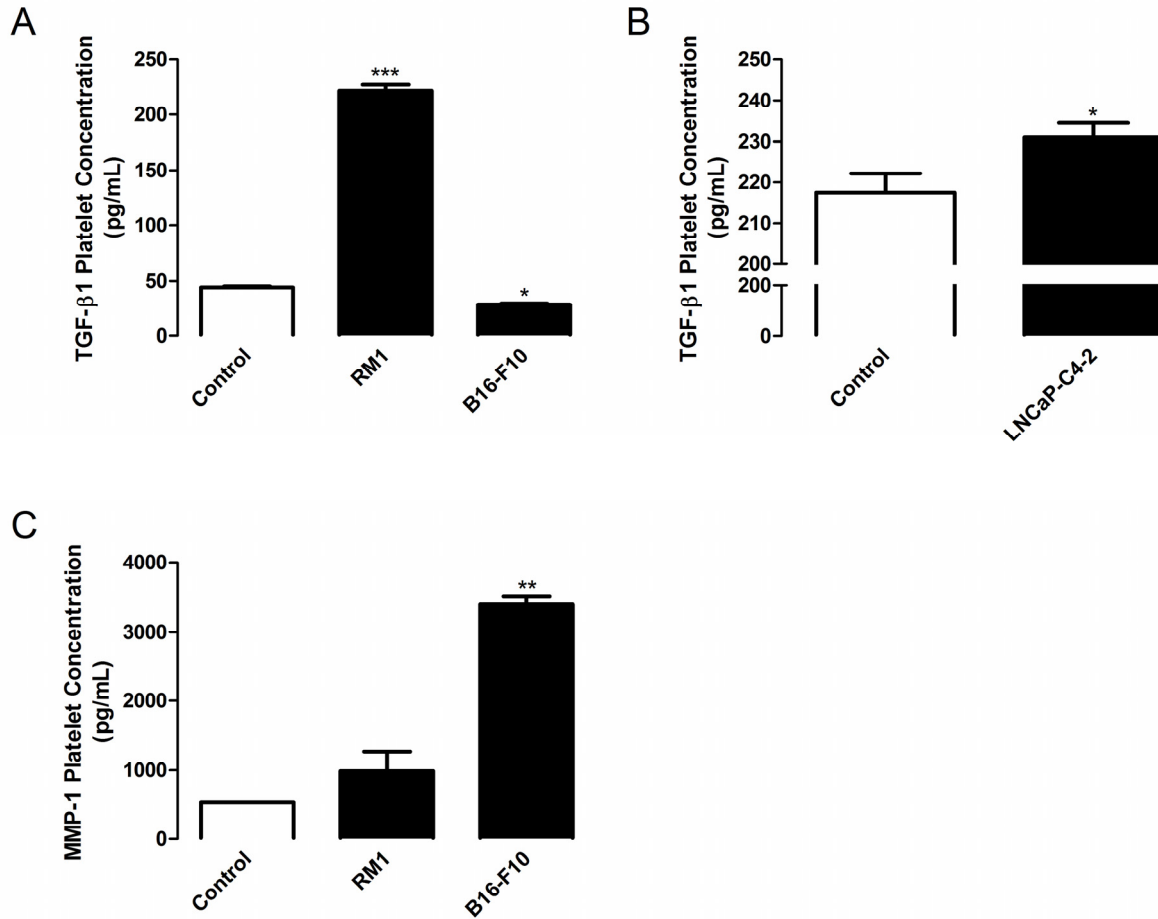

**Supplemental Figure 2. MMP-1 and TGF-β1 levels are increased in the platelets of mice bearing tumors.** Platelet releasates were isolated from control injected mice or mice bearing RM1, B16-F10 or LNCaP-C4-2 tumors upon experimental termination (B16-F10: 9 days; RM1: 12 days; LNCaP-C4-2: 19 days) and subjected to (A and B) Invitrogen Multi-Species TGF-β1 ELISA (Camarillo, CA) or (C) MyBioSource Mouse MMP-1 ELISA (San Diego, CA) assays to measure the concentration of proteins represented as mean ± SEM ( $n=2-3$ ). \*  $p<0.05$ , \*  $p<0.01$ , and \*\*\*  $p<0.005$  vs. control by unpaired Student's  $t$  test.
